## Correction

# Correction: Density, Destinations or Both? A Comparison of Measures of Walkability in Relation to Transportation Behaviors, Obesity and Diabetes in Toronto, Canada

The *PLOS ONE* Staff

In the author list, author Vered Kaufman Shriqui is listed incorrectly. The correct name is Vered Kaufman-Shriqui.

## Reference

1. Glazier RH, Creatore MI, Weyman JT, Fazli G, Matheson FI, et al. (2014) Density, Destinations or Both? A Comparison of Measures of Walkability in Relation to Transportation Behaviors, Obesity and Diabetes in Toronto, Canada. *PLoS ONE* 9(1): e85295. doi:10.1371/journal.pone.0085295

**Citation:** The *PLOS ONE* Staff (2014) Correction: Density, Destinations or Both? A Comparison of Measures of Walkability in Relation to Transportation Behaviors, Obesity and Diabetes in Toronto, Canada. *PLoS ONE* 9(3): e91485. doi:10.1371/journal.pone.0091485

**Published:** March 14, 2014

**Copyright:** © 2014 The *PLOS ONE* Staff. This is an open-access article distributed under the terms of the Creative Commons Attribution License, which permits unrestricted use, distribution, and reproduction in any medium, provided the original author and source are credited.
